# Supplementary material for: Idiopathic basal ganglia calcification-associated PDGFRB mutations impair the receptor signalling
Source: PubMed Central journal article supplement (PMC4288366; doi:10.1111/jcmm.12443), 2014-10-08
Supplement: jcmm0019-0239-sd1.pdf [file jcmm0019-0239-sd1.pdf]

**A**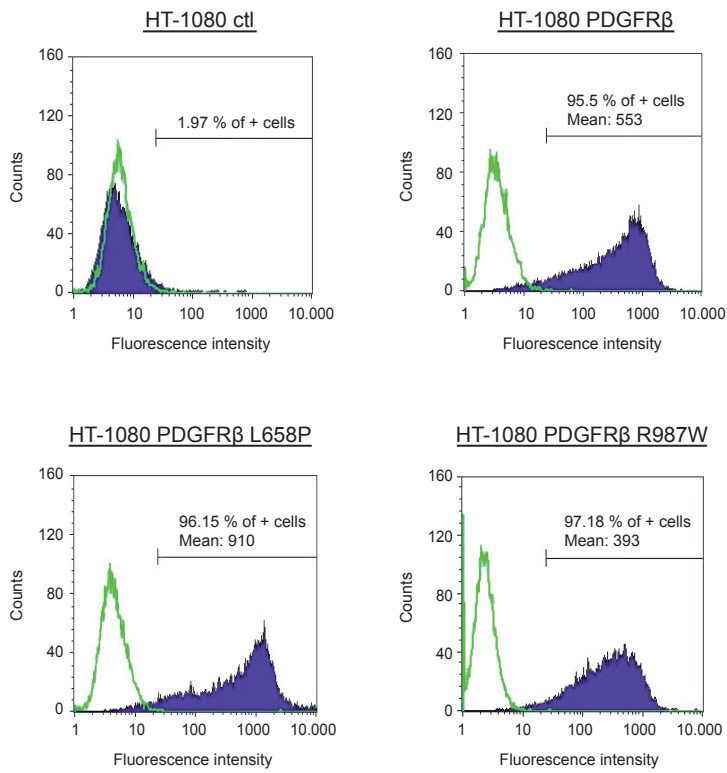**B**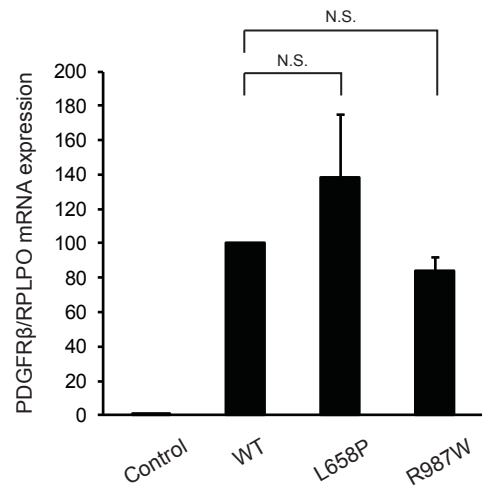

### Suppl. Figure 1: Stable expression of PDGFR $\beta$ in HT-1080 cells.

**A. Expression of the wild-type and mutant receptors at the plasma membrane.** HT-1080 cells stably expressing the wild-type receptor, the L658P mutant or the R987W mutant were subjected to flow cytometry. To assess the percentage of HT-1080 cells that effectively expressed wild-type or mutant PDGFR $\beta$ , 500 000 cells were stained by using anti-PDGFR $\beta$  (AH 17.2) primary antibody (5  $\mu$ g/ml) for 40 minutes at 4°C and a secondary antibody coupled to phycoerythrin (purple histograms) for the same period of time. As a negative control, cells were only incubated with the secondary antibody (green line). The cells were then analyzed by flow cytometry using a FACSCalibur instrument. One experiment out of two is represented.

**B. mRNA level of the wild-type and mutant receptors.** RNA was extracted from subconfluent HT-1080 cells stably expressing wild-type or mutant PDGFR $\beta$  with RNeasy Mini Kit (Qiagen). RNA (1  $\mu$ g) was reverse transcribed by using M-MLV (Moloney Murine Leukemia Virus) reverse transcriptase (Invitrogen). To assess the level of PDGFRB mRNA, quantitative PCR was performed with 2  $\mu$ l of cDNA and 23  $\mu$ l of Absolute QPCR SYBR Green Fluorescein Mix 1x containing 70 nM of each of the following primers: GACCCCAAACCCGAGGTT and ATGGTTGAGGAGGTGTTGACTT. For each sample, qPCR was performed in triplicate. The results were represented as a ratio between PDGFRB mRNA level and RPLPO mRNA level. This ratio was set to 100% for wild-type PDGFRB. As a control, untransfected HT-1080 cells were used. The mean of three independent experiments is shown with S.E.M. (Student t-test; N.S., not significant).
